# Supplementary material for: Technical note: Reanalysis of Aura MLS chemical observations
Source: Copernicus journal article supplement (doi:10.5194/acp-19-13647-2019), 2019-11-11
Supplement: Supplementary file 1 [file acp-19-13647-2019-supplement.pdf]

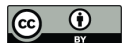

*Supplement of*

## **Technical note: Reanalysis of Aura MLS chemical observations**

**Quentin Errera et al.**

*Correspondence to:* Quentin Errera ([quentin.errera@aeronomie.be](mailto:quentin.errera@aeronomie.be))

The copyright of individual parts of the supplement might differ from the CC BY 4.0 License.

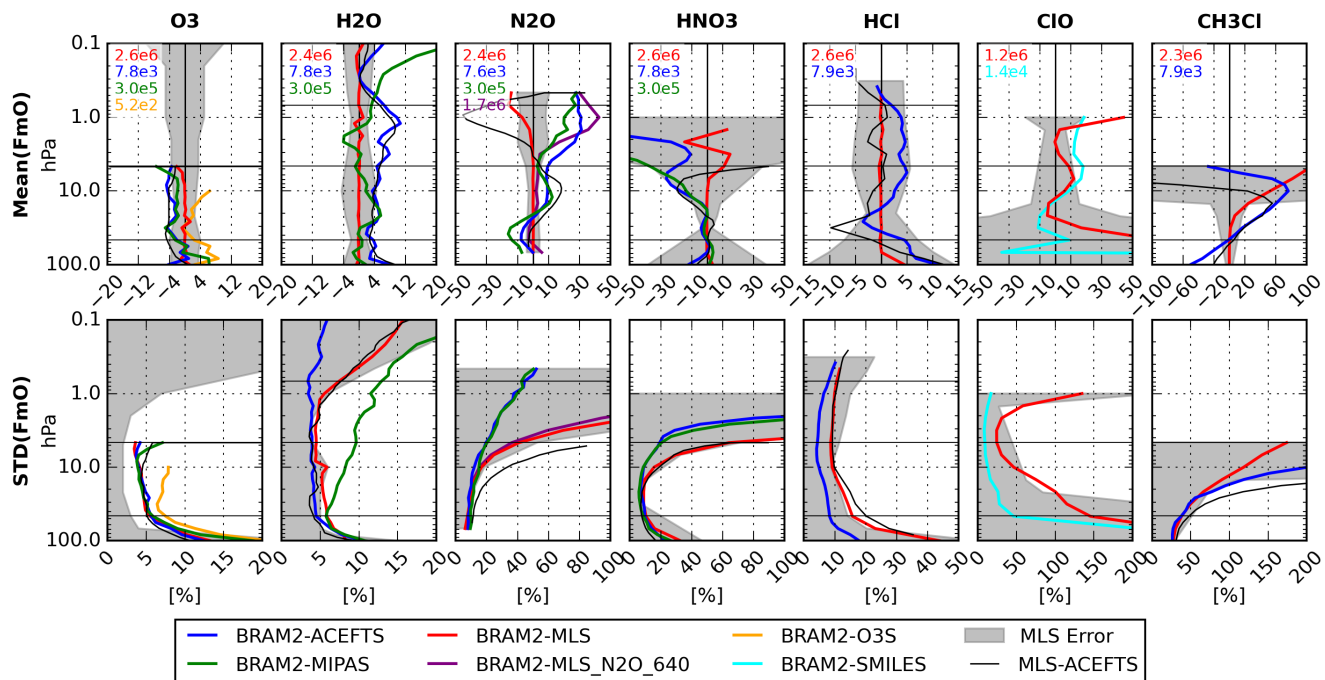

**Figure S1.** As Fig. 5 but between 60°S-30°S.

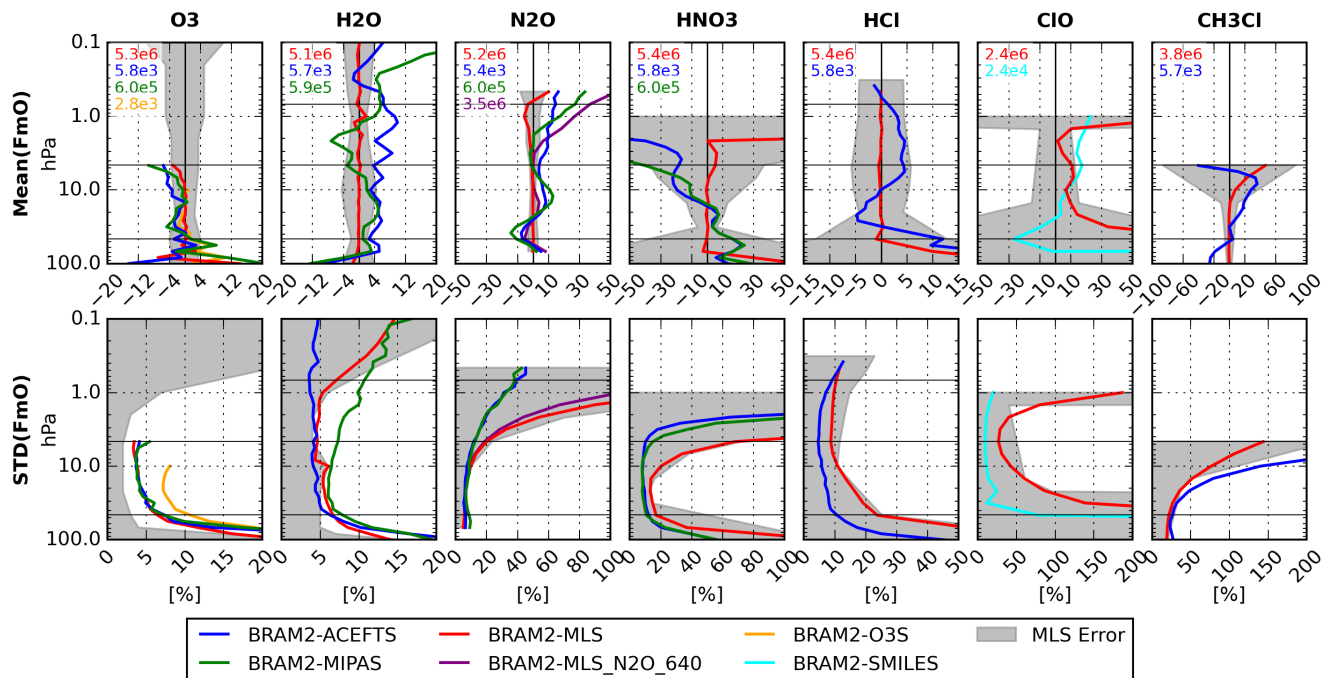

**Figure S2.** As Fig. 5 but between 30°S-30°N.

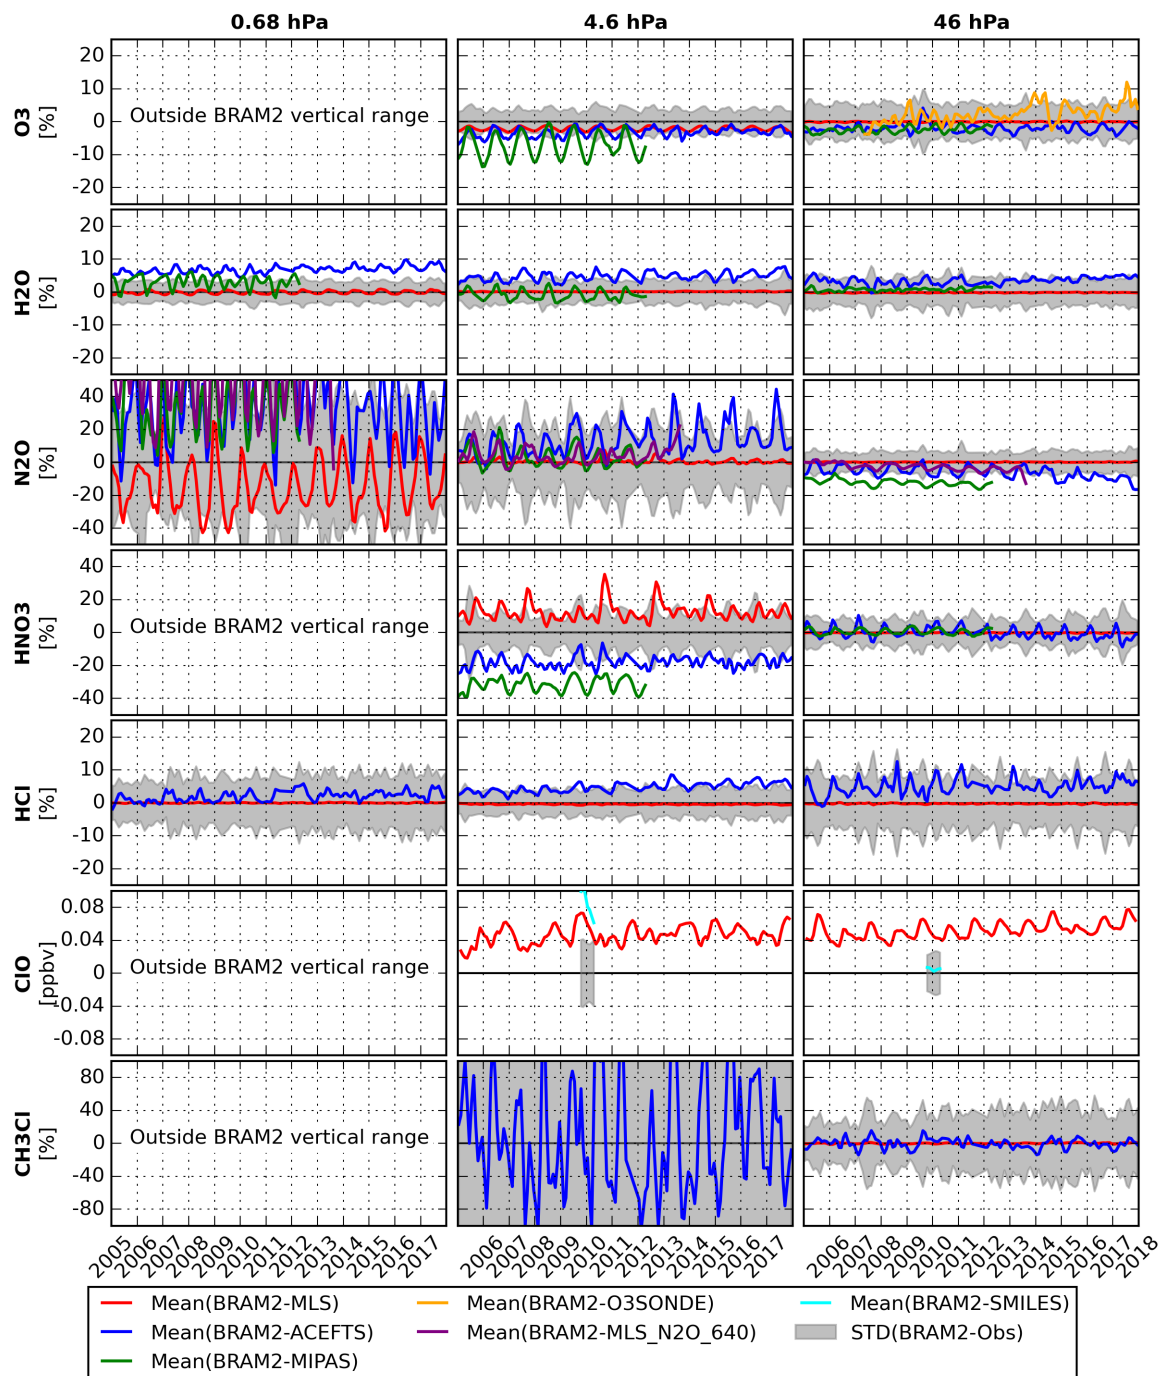

**Figure S3.** As Fig. 6 but between 60°S-30°S.

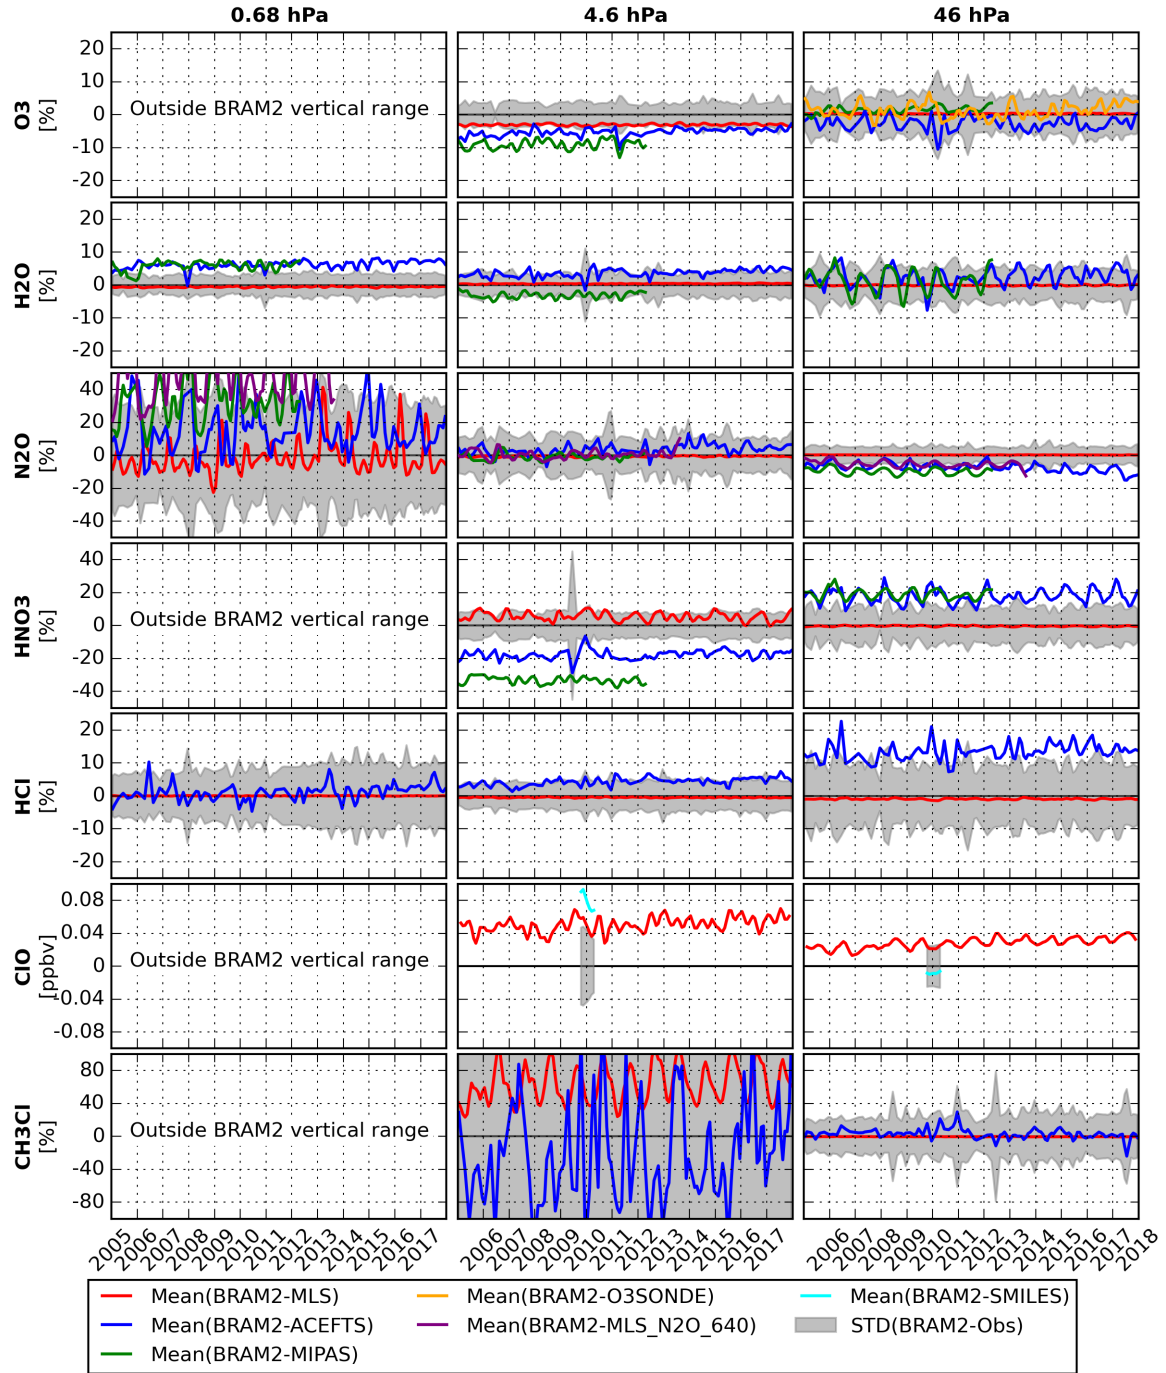

**Figure S4.** As Fig. 6 but between 30°S-30°N.

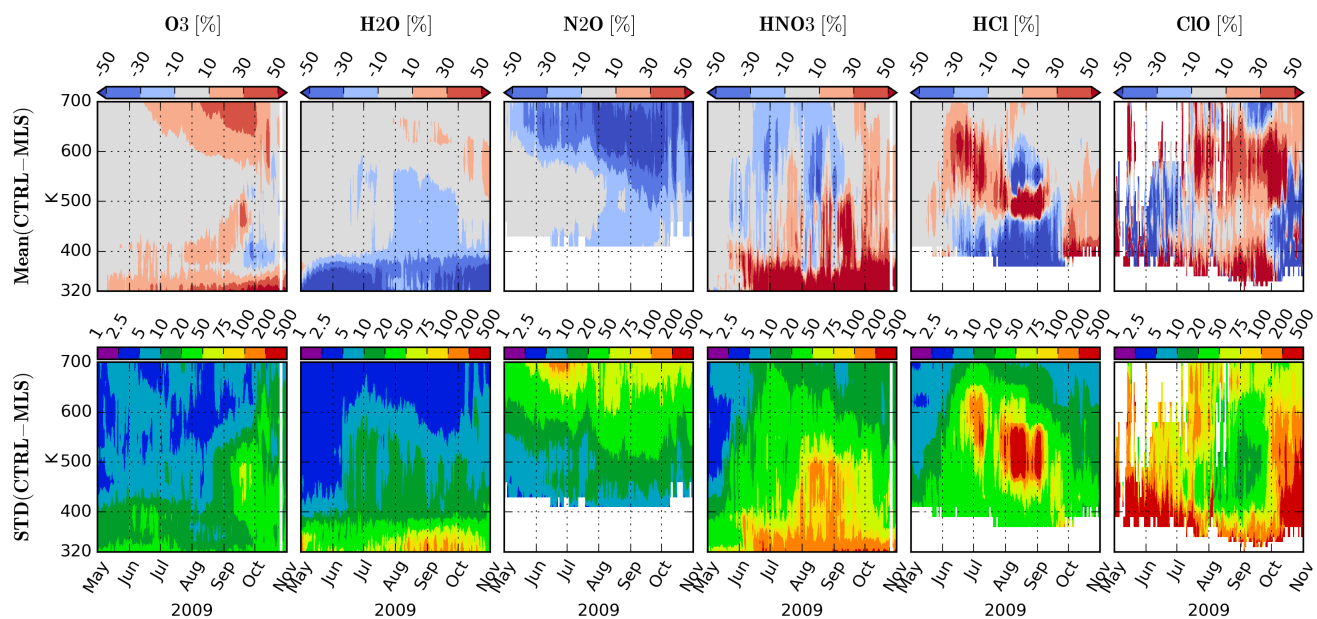

**Figure S5.** Mean (top) and standard deviations (bottom) of the difference (CTRL-MLS) for the conditions shown in Fig. 7.

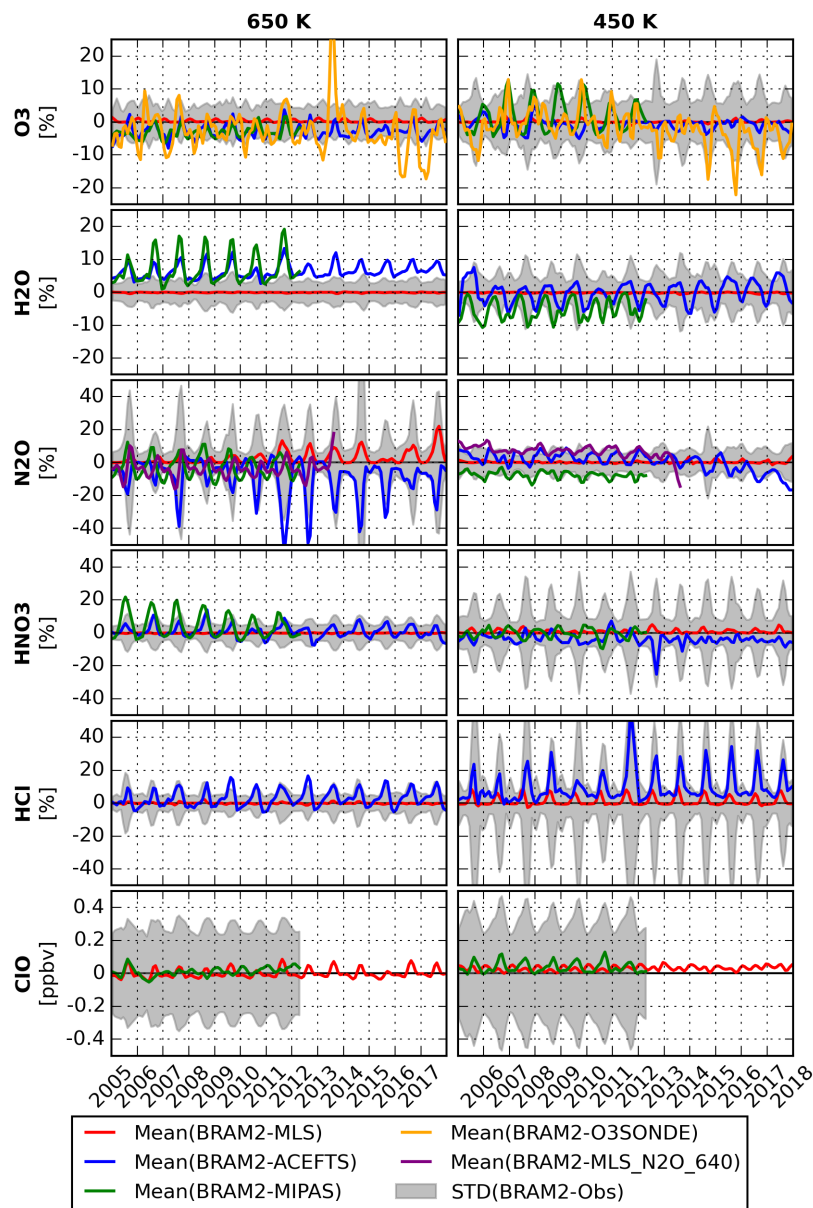

**Figure S6.** As Fig. 8 but in the outer Antarctic polar vortex between (75°S-60°S of equivalent latitude).



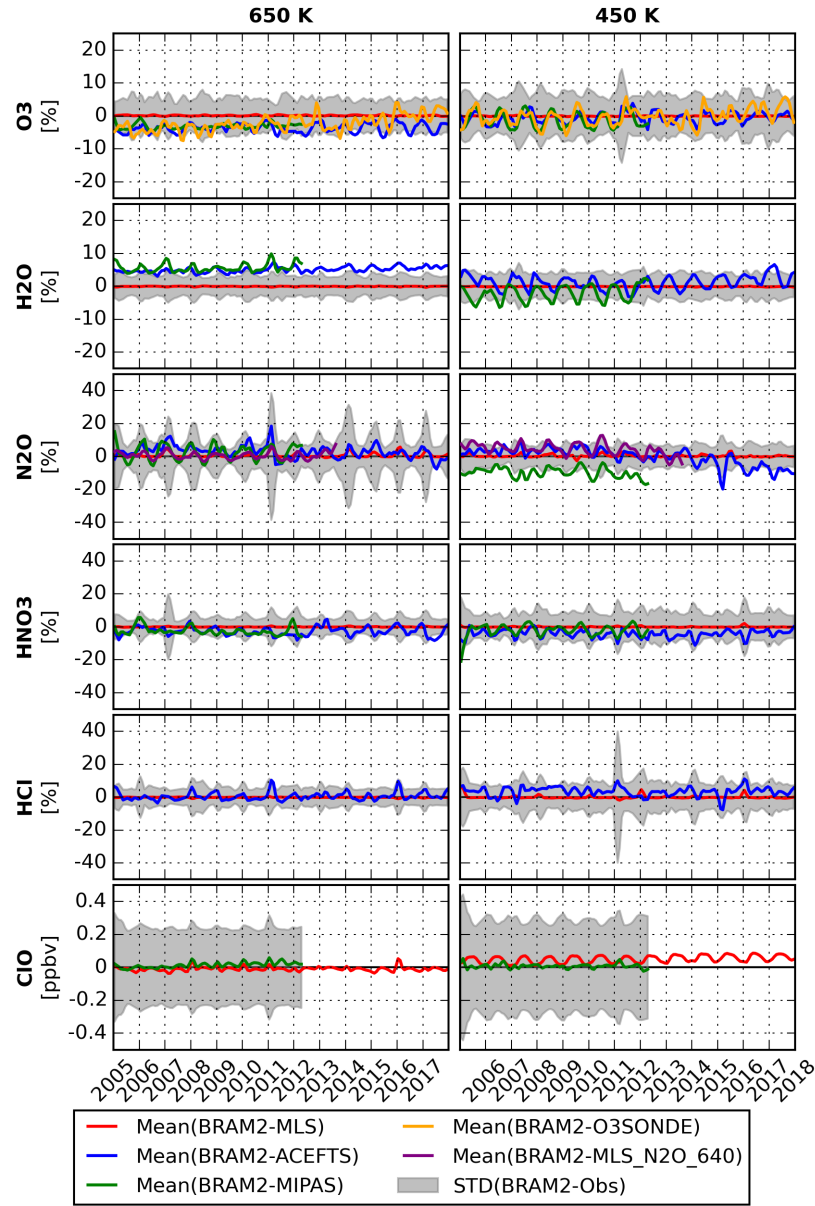

**Figure S7.** As Fig. 8 but in the outer Arctic polar vortex between (60°N-75°N of equivalent latitude).

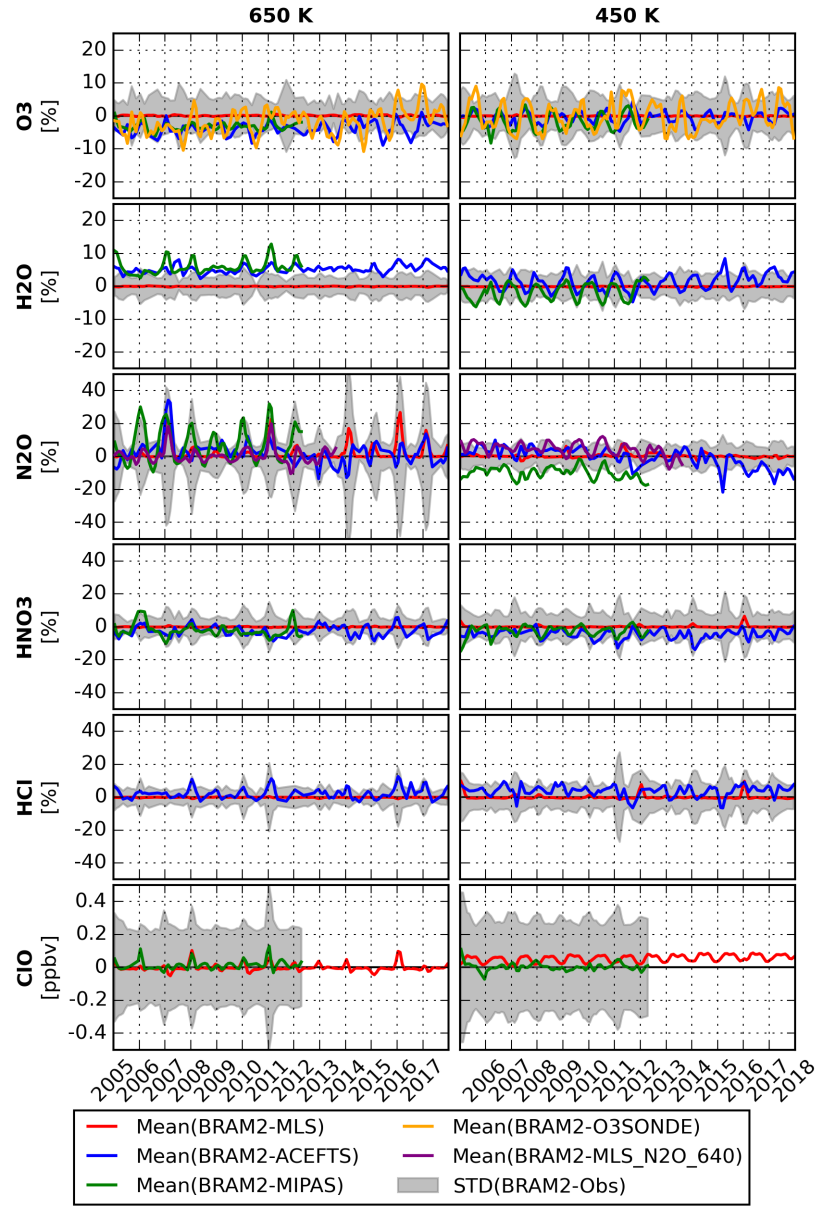

**Figure S8.** As Fig. 8 but in the outer Arctic polar vortex between (75°N-90°N of equivalent latitude).



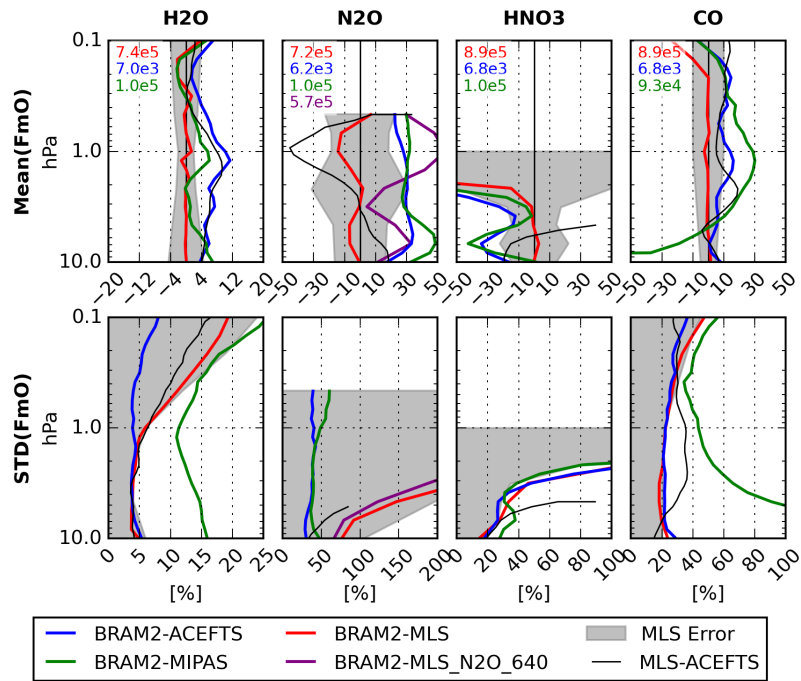

**Figure S9.** As Fig. 10 but between 90°S-60°S.

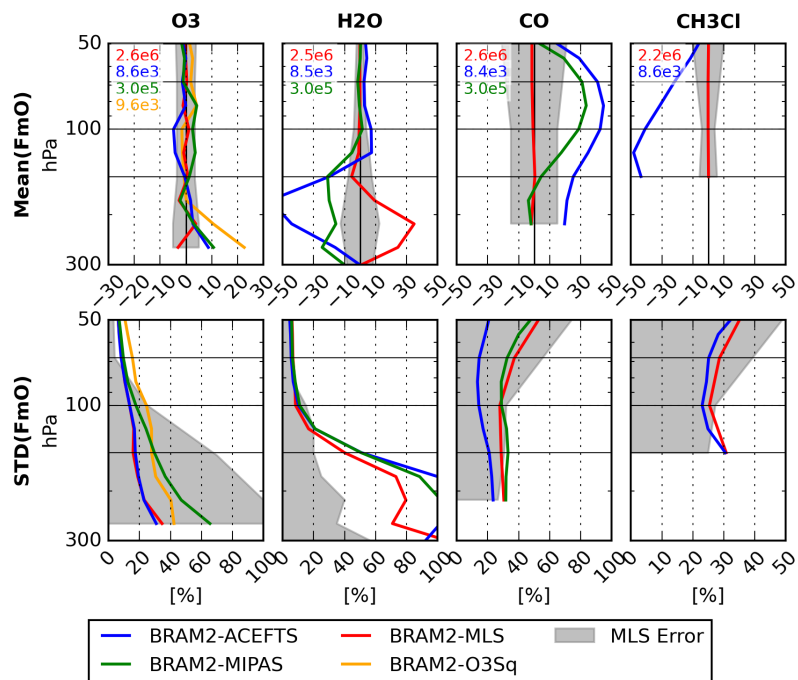

**Figure S10.** As Fig. 12 but between 30°N-60°N.

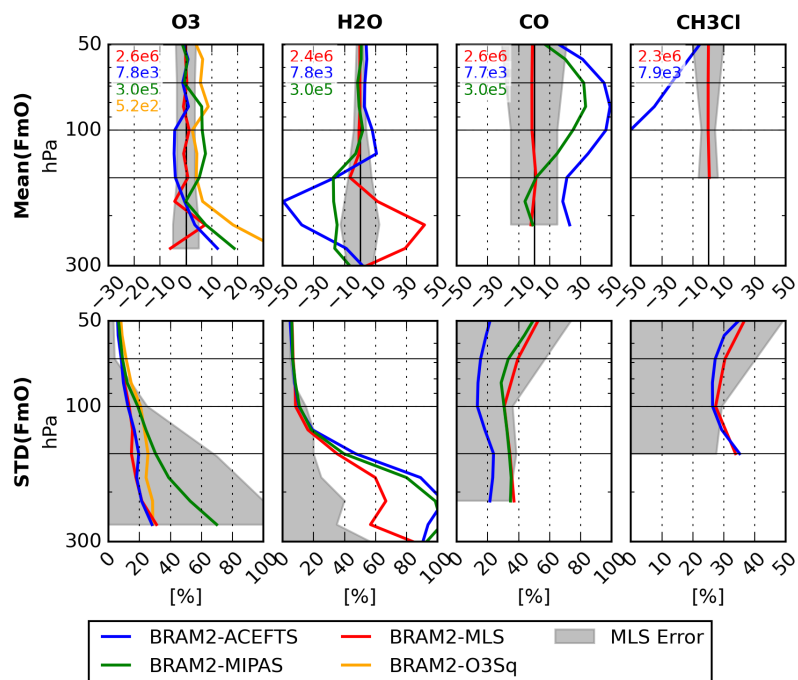

**Figure S11.** As Fig. 12 but between 60°S-30°S.

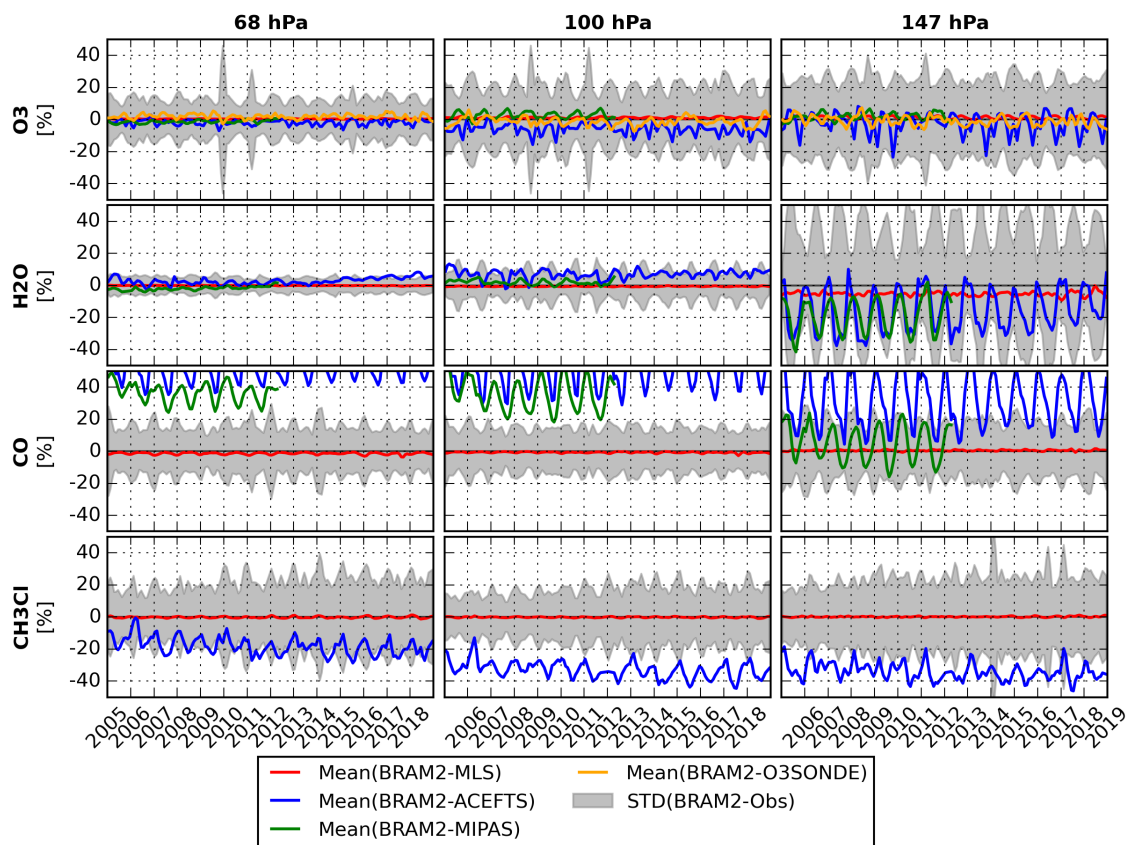

**Figure S12.** As Fig. 12 but between 30°N-60°N.

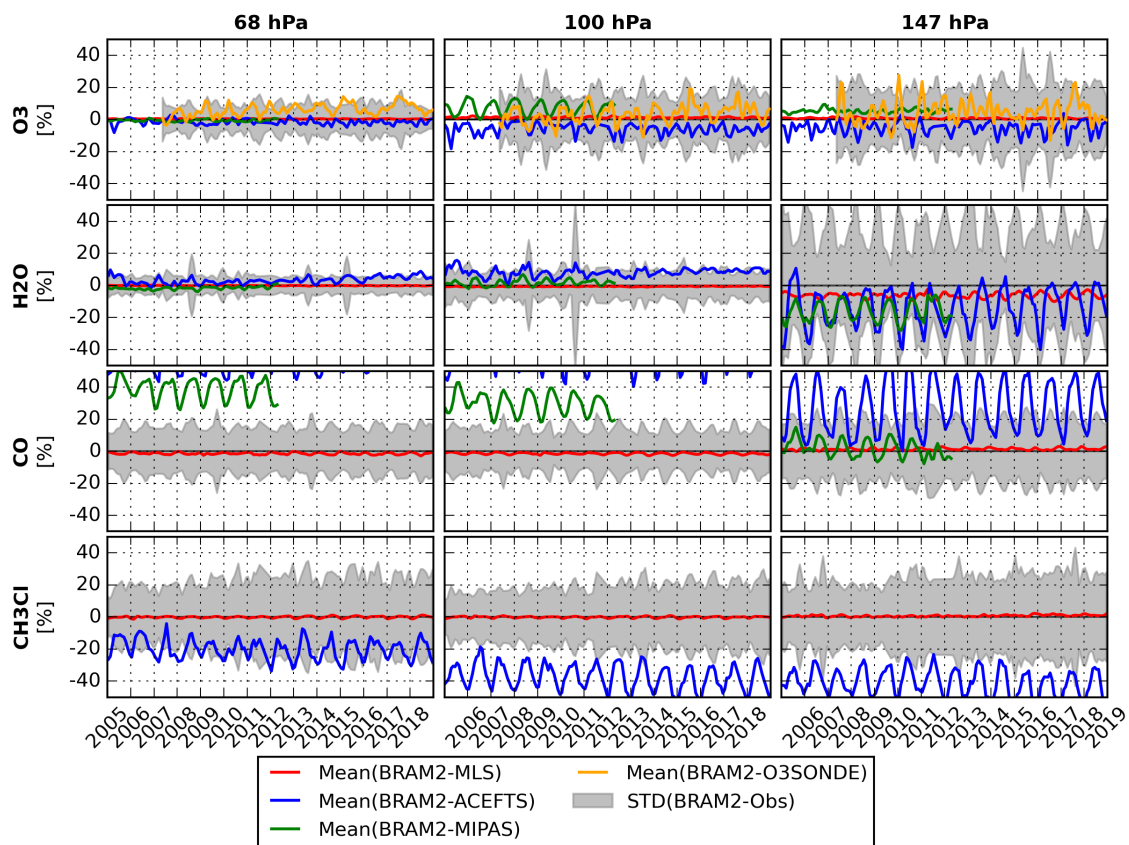

**Figure S13.** As Fig. 13 but between 60°S-30°S.

**Table S1.** Mean difference and standard deviation between BRAM2 and observations for the 2005-2017 period at three typical levels in the ex-UTLS: 68, 100 and 147 hPa. Values are in %, normalized by BRAM2. Abbreviations: Not Assimilated (N. A.).

| Species            | Instruments | 68 hPa          | 100hPa          | 147 hPa         |
|--------------------|-------------|-----------------|-----------------|-----------------|
| O <sub>3</sub>     | MLS         | $0 \pm 8 \%$    | $1 \pm 13 \%$   | $1 \pm 16 \%$   |
|                    | ACE-FTS     | $-2 \pm 8 \%$   | $-5 \pm 13 \%$  | $-1 \pm 17 \%$  |
|                    | MIPAS       | $-1 \pm 9 \%$   | $4 \pm 17 \%$   | $1 \pm 30 \%$   |
|                    | O3sondes    | $2 \pm 15 \%$   | $-2 \pm 25 \%$  | $-1 \pm 28 \%$  |
| H <sub>2</sub> O   | MLS         | $0 \pm 7 \%$    | $-1 \pm 8 \%$   | $-5 \pm 40 \%$  |
|                    | ACE-FTS     | $2 \pm 6 \%$    | $7 \pm 10 \%$   | $-20 \pm 50 \%$ |
|                    | MIPAS       | $-2 \pm 6 \%$   | $1 \pm 11 \%$   | $-20 \pm 50 \%$ |
| CO                 | MLS         | $-1 \pm 35 \%$  | $-1 \pm 28 \%$  | $0 \pm 29 \%$   |
|                    | ACE-FTS     | $40 \pm 14 \%$  | $42 \pm 14 \%$  | $25 \pm 22 \%$  |
|                    | MIPAS       | $30 \pm 33 \%$  | $30 \pm 28 \%$  | $5 \pm 33 \%$   |
| CH <sub>3</sub> Cl | MLS         | $0 \pm 30 \%$   | $0 \pm 25 \%$   | $0 \pm 30 \%$   |
|                    | ACE-FTS     | $-20 \pm 25 \%$ | $-40 \pm 23 \%$ | $-45 \pm 30 \%$ |
